# Supplementary material
Source: PubMed Central journal article supplement (PMC8525505)
Supplement: NIHMS1725085-supplement-1.pdf [file NIHMS1725085-supplement-1.pdf]

## Supplementary Data

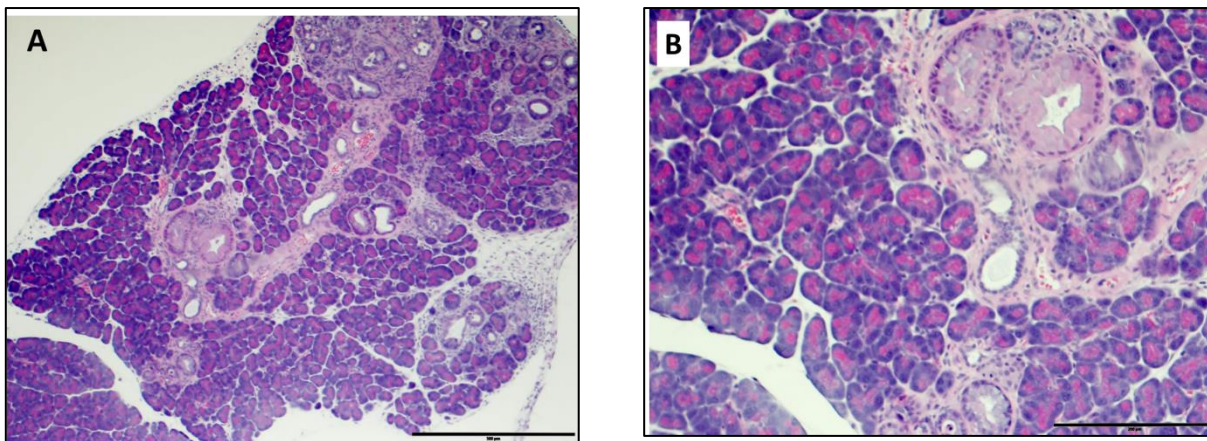

**Figure S1.** Representative H&E histology of pancreas from LSL-Kras<sup>G12D/+</sup>; *P48-Cre* mouse at three months of age shows that PanIN lesions are present at this age when the PAS-vaccination was initiated. **A**, scale bar 500μm. **B**, scale bar 200μm

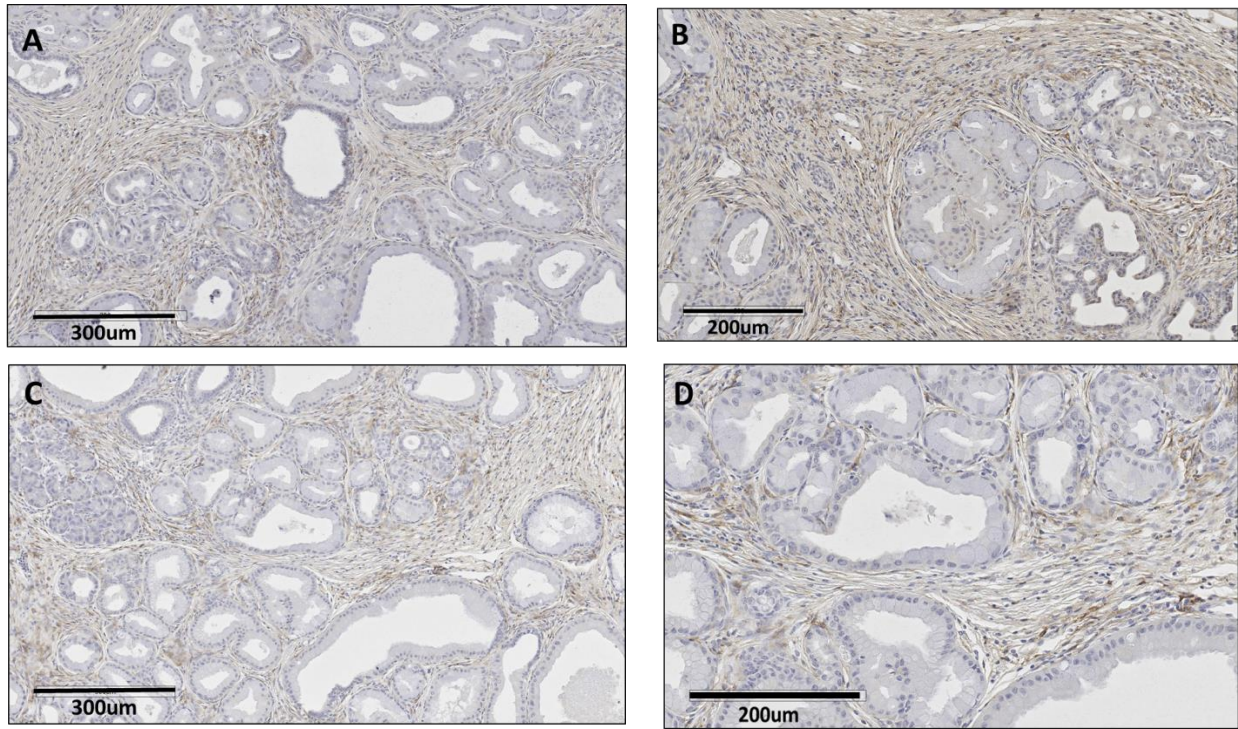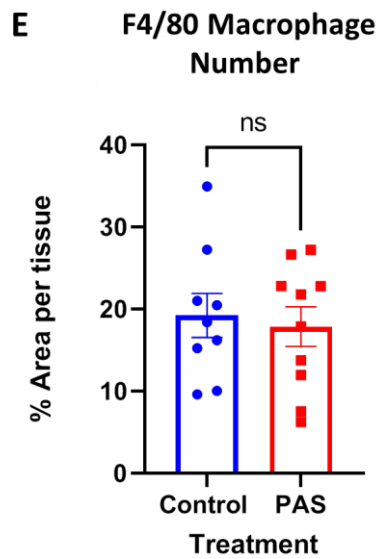

**Figure S2.** Immunohistochemistry for macrophages in the pancreas extracellular matrix stained with F4/80 (1:40). **A**, Control mouse pancreas, 300µm. **B**, Control mouse pancreas, 200µm. **C**, PAS-treated mouse pancreas, 300µm. **D**, PAS-treated mouse pancreas, 200µm. **E**, Densitometry analysis of macrophage staining shows no significant difference in total macrophage number between controls and PAS-treated mouse pancreas.

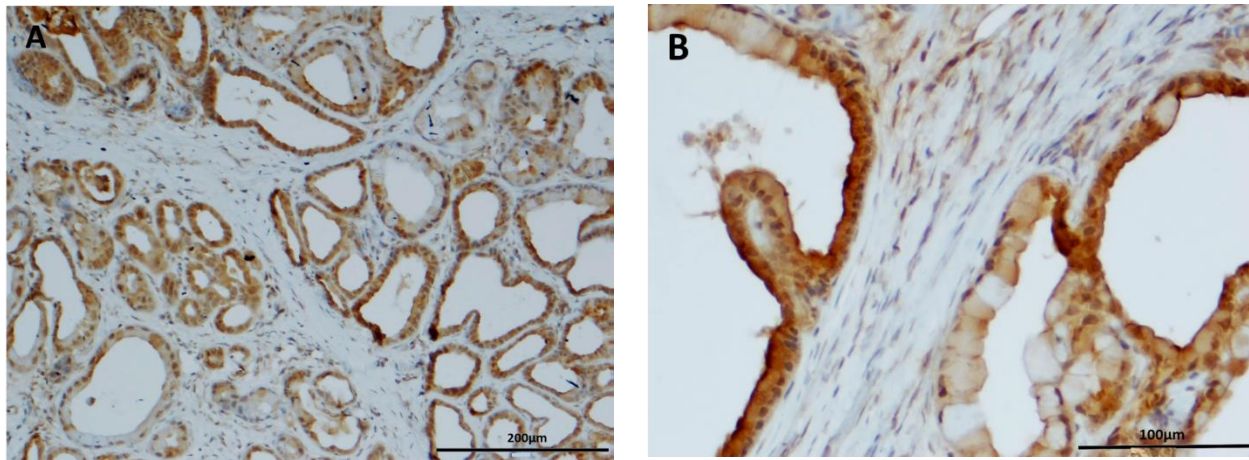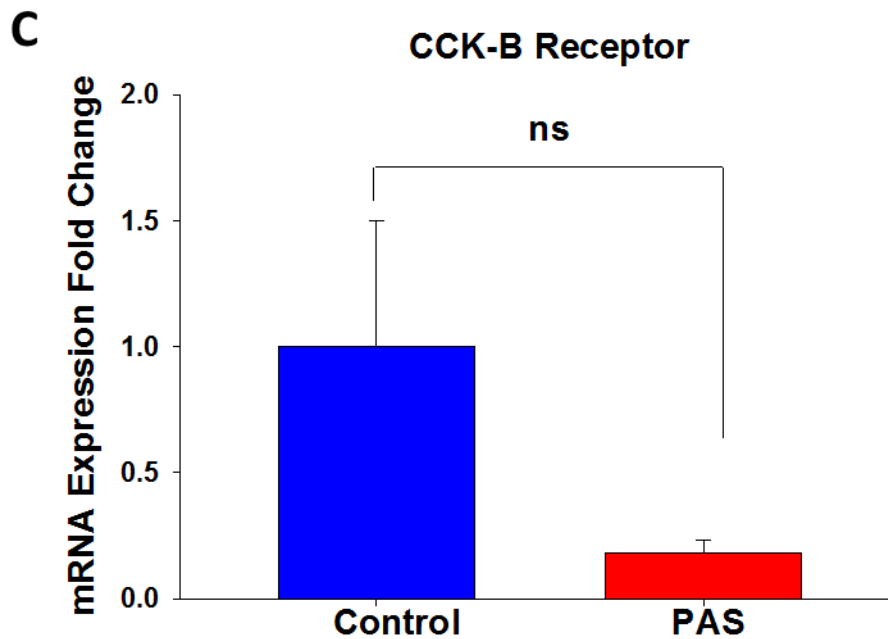

**Figure S3.** CCK-B receptor expression in the LSL-Kras<sup>G12D/+</sup>; *P48-Cre* mouse pancreas  
**A**, Immunohistochemistry of mouse pancreas showing positive staining for the CCK-B receptor. Lower magnification (10X) reveals immunoreactivity in epithelial cells of the PanIN lesions of the LSL-Kras<sup>G12D/+</sup>; *P48-Cre* mouse pancreas. **B**, CCK-B receptor staining is intense in this high grade PanIN-3 lesion (magnification 20X). **C**, Mean ± SEM values of CCK-B receptor mRNA expression by qRT-PCR in the control pancreas and the PAS-treated mouse pancreas is shown; ns = not significant.
